# Supplementary material for: Emotion modulation of the body-selective areas in the developing brain
Source: PubMed Central journal article supplement — Dev Cogn Neurosci. 2019 May 17;38:100660. doi: 10.1016/j.dcn.2019.100660 (PMC6969350; doi:10.1016/j.dcn.2019.100660), 2019-05-17
Supplement: mmc1.pdf [file mmc1.pdf]

# 1 Supplementary Material

## 1.1 Bodies > Non-Human

A 2x4 Hemisphere x ROI ANOVA with Age added as a covariate revealed no main effect of ROI ( $F(3,201)=1.6$ ,  $p=.2$ ,  $\eta^2_p = .02$ ), and no main effect of hemisphere ( $F(1,67)=0$ ,  $p=.99$ ,  $\eta^2_p = .0$ ). Further, we observed no ROI and hemisphere interaction ( $F(3,201)=1.4$ ,  $p=.24$ ,  $\eta^2_p = .02$ ), a significant interaction between ROI and age ( $F(3,201)=9.5$ ,  $p<.001$ ,  $\eta^2_p = .13$ ), interaction between hemisphere and age ( $F(2,67)=15.75$ ,  $p<.001$ ,  $\eta^2_p = .2$ ) and a three-way interaction between hemisphere, ROI and age ( $F(3,201)=3.9$ ,  $p<.01$ ,  $\eta^2_p = .06$ ).

Bonferroni post-hoc analyses revealed that there was a significant increase in activation across age in all ROIs (all  $p<.005$ ) with the exception of the lFBA ( $p=.04$ ; new Bonferroni corrected significance threshold  $p=.00625$ ).

## 1.2 Emotion Bodies > Neutral Bodies

To explore the developmental trajectories of emotion modulation we broke down the 'Bodies' condition into the 3 emotions (Angry, Happy and Neutral). A 2x3x4 Hemisphere x Emotion x ROI ANOVA of the peak  $t$ -values with Age (in months) added as a covariate revealed the following:

We found a main effect of emotion ( $F(2,134)=8.7$ ,  $p<.001$ ,  $\eta^2_p = .11$ ) which was driven by Angry and Happy giving significantly higher peak  $t$  values compared to Neutral ( $P<.001$ ). We found no significant difference between Angry and Happy.

We found no main effect of hemisphere ( $F(1,67)=.56$ ,  $p=.46$ ,  $\eta^2_p = .01$ ), nor significant interactions between ROI and emotion ( $F(6,396)=29.6$ ,  $p<.001$ ,  $\eta^2_p = .31$ ) or ROI and hemisphere ( $F(3,201)=.71$ ,  $p=.55$ ,  $\eta^2_p = .01$ ).

Crucially, we also found that none of these effects showed any interaction with age (Emotion x Age  $F(2,134)=.29$ ,  $p=.75$ ,  $\eta^2_p = .00$ ; ROI x Emotion x Age  $F(6,402)=.98$ ,  $p=.43$ ,  $\eta^2_p = .01$ ; ROI x Hemisphere x Age  $F(2,201)=2.4$ ,  $p=.0.7$ ,  $\eta^2_p = .04$ ).
